# Supplementary material
Source: Springer Nature journal article supplement (https://www.springermedizin.de/resource/supplementary/12885_2010_2631_MOESM3_ESM.pdf/9461592)

## a. Benign Breast Diseases

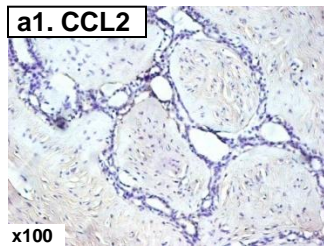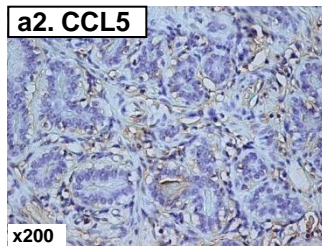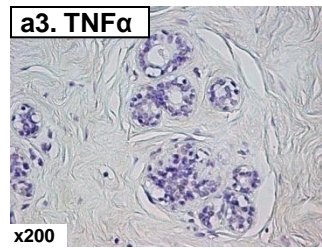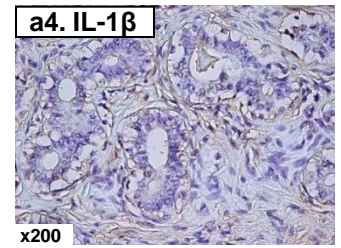

## b. Ductal Carcinoma *In Situ*

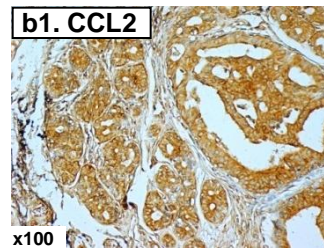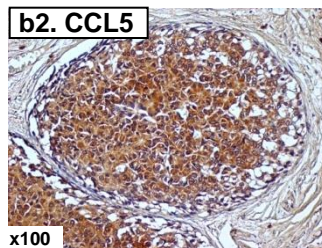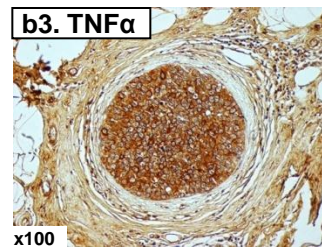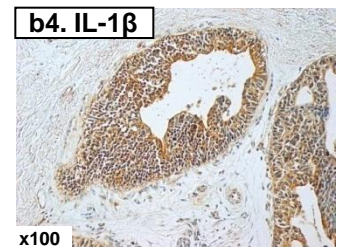

## c. Invasive Ductal Carcinoma – No Relapse

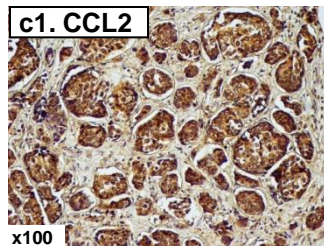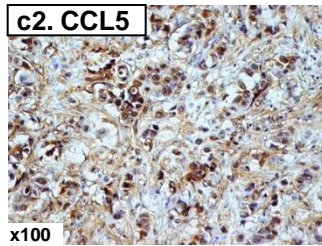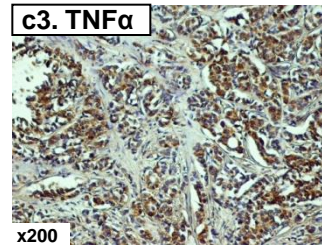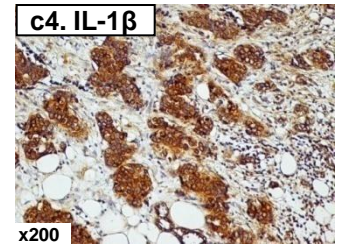

## d. Invasive Ductal Carcinoma – With Relapse

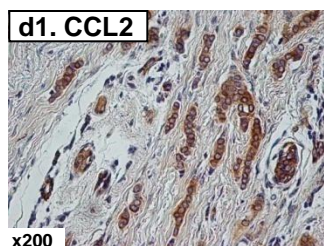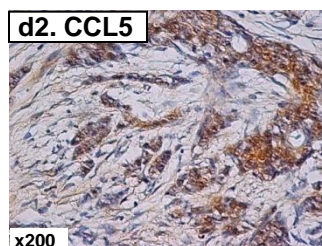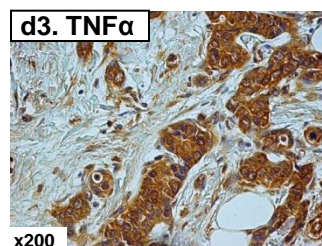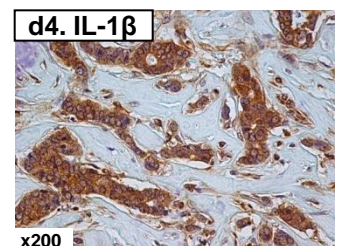

Supplement: MOESM3 [file 9461592]
